# Supplementary material for: Identification of Bacteria in Two Food Waste Black Soldier Fly Larvae Rearing Residues
Source: Frontiers journal article supplement (doi:10.3389/fmicb.2020.582867), 2020-11-23
Supplement: Data_Sheet_1.pdf [file Data_Sheet_1.pdf]

**Identification of Bacteria in Two Food Waste Black Soldier Fly Larvae Rearing Residues**

**Supplementary Material**

**Supplementary Table 1:** Pictures of the fresh and homogenized food waste substrates used for BSFL rearing.

| Substrate                           | Fresh                                                                               | Homogenized                                                                          |
|-------------------------------------|-------------------------------------------------------------------------------------|--------------------------------------------------------------------------------------|
| Can-teen and sterile can-teen waste |    |    |
| House-hold waste                    |  |  |

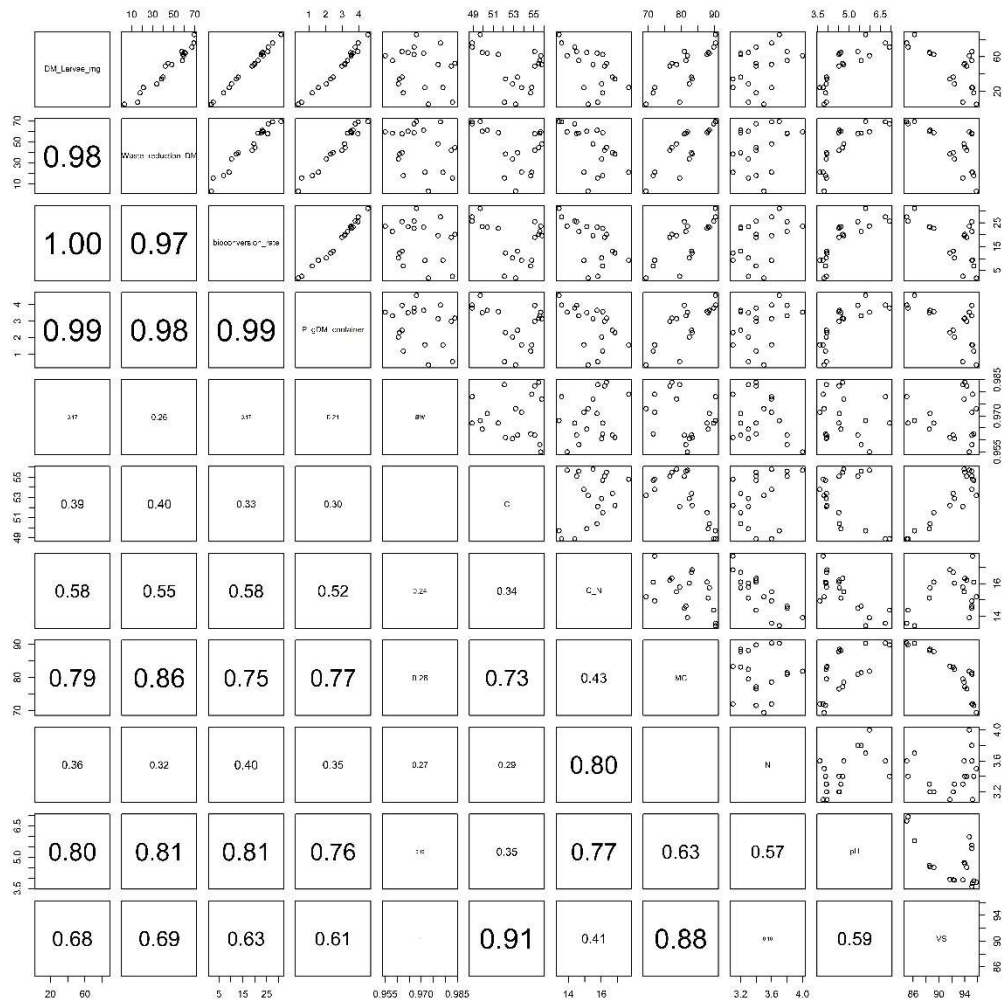

**Supplementary Figure 1:** Pearson correlation matrix to identify co-linearity between rearing performance metrics and physio-chemical residue composition parameters before Distance-based redundancy analysis (dbRDA). Correlation coefficients  $-0.7 < r < 0.7$  indicate strong co-linearity.

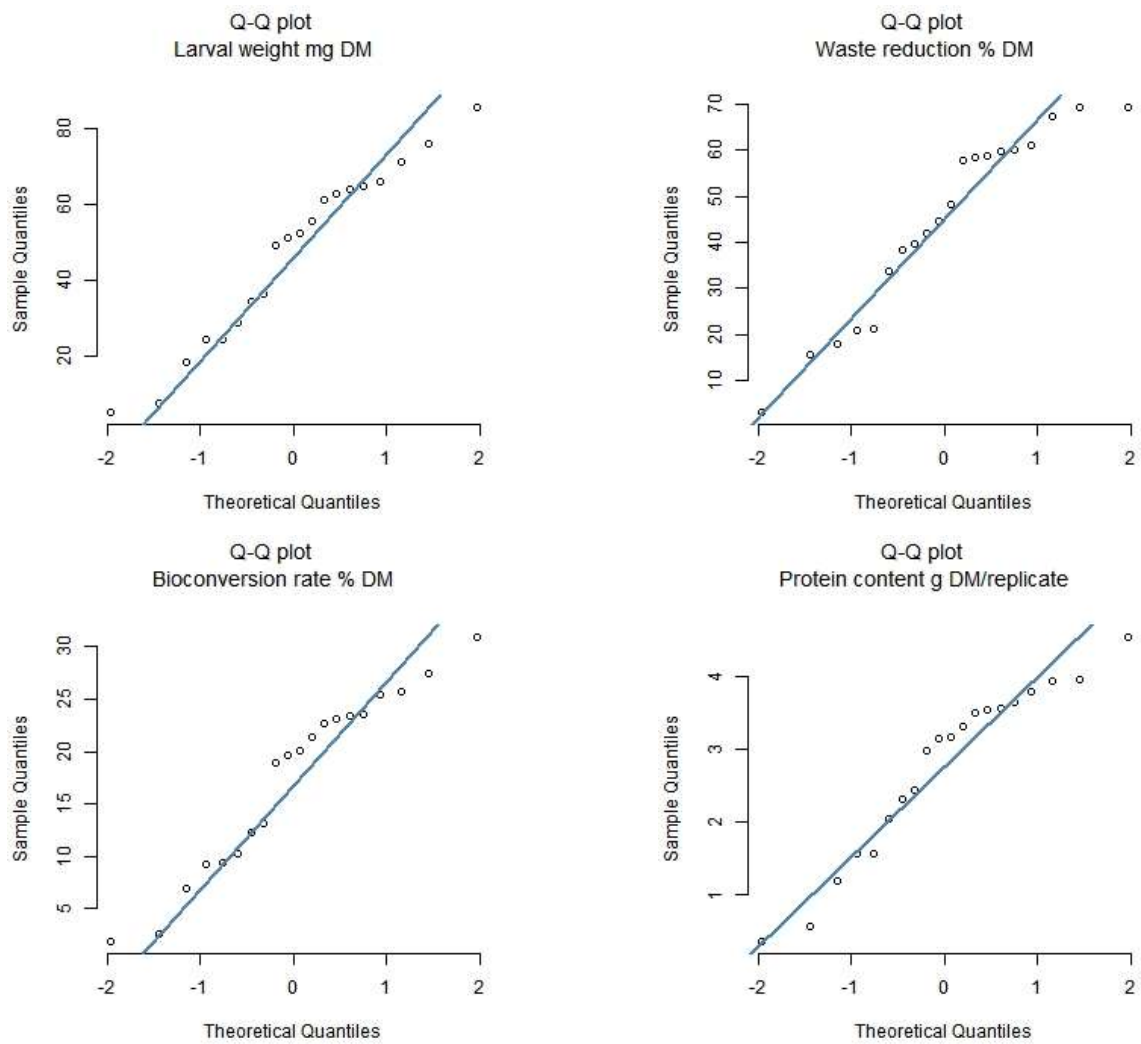

**Supplementary Figure 2:** Q-Q plots of performance indicators to assess normality. Larval weight (top, left), waste reduction (top, right), bioconversion rate (bottom, left) and protein content (bottom, right).

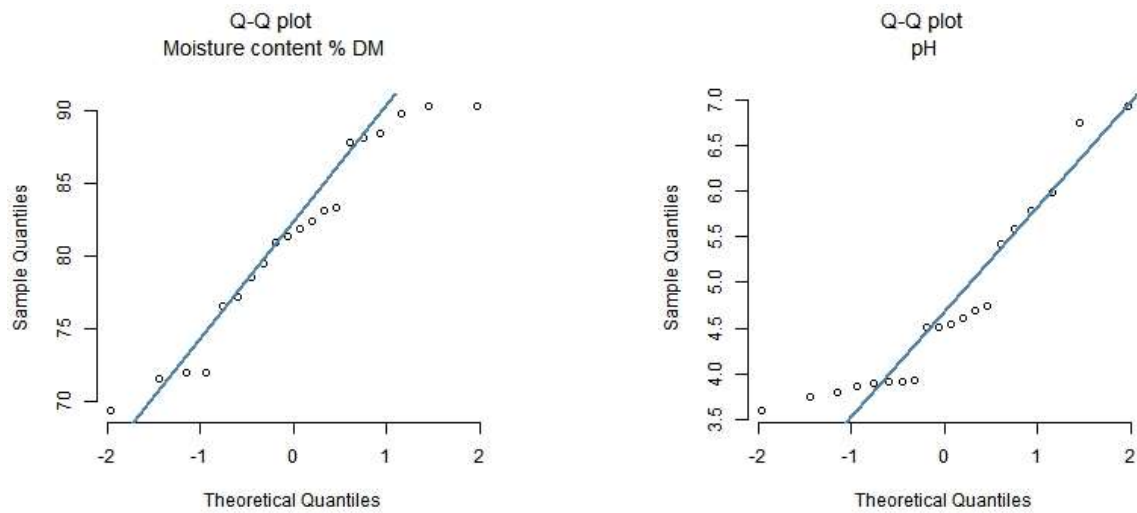

**Supplementary Figure 3:** Q-Q plots of physio-chemical residue composition parameters to assess normality. Moisture content (left) and pH (right) had a strong correlation with rearing performance indicators (see Pearson correlation matrix)

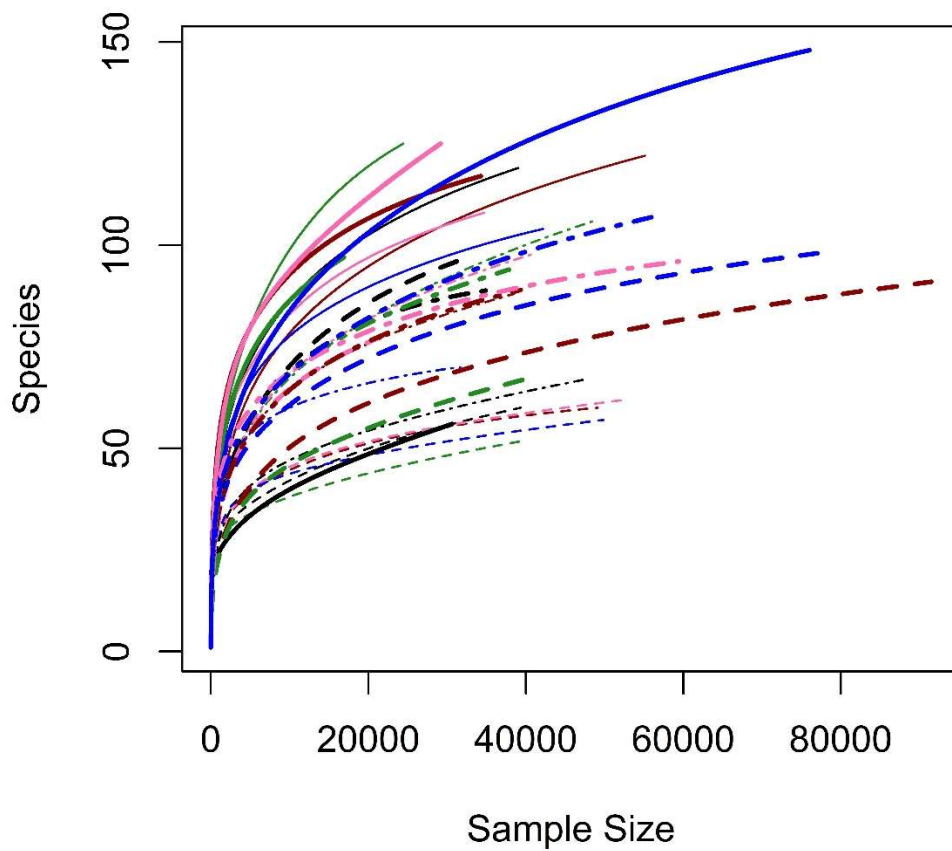

**Supplementary Figure 4:** Rarefaction curves of all substrate and residue samples. Colors and line types represent the different samples.

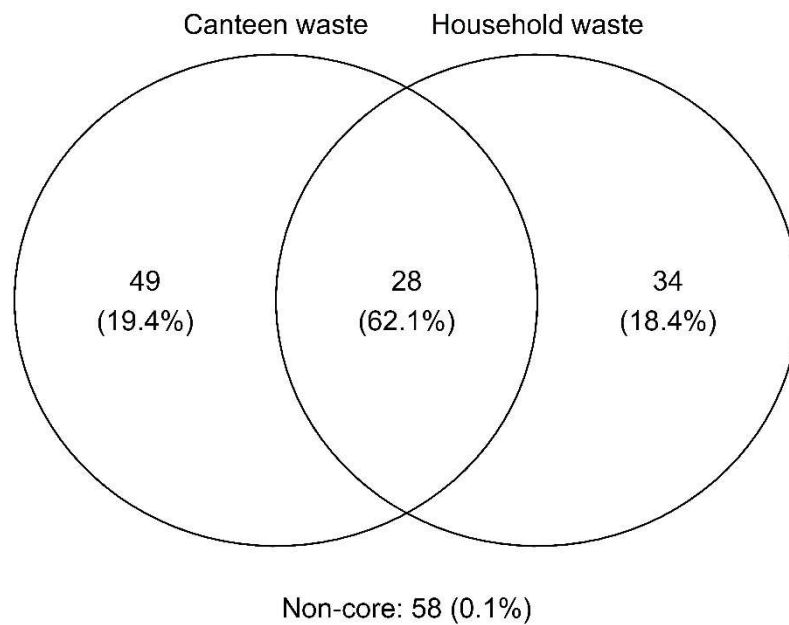

**Supplementary Figure 5:** Venn diagram showing shared ZOTUs between the canteen and household waste rearing substrates. Venn diagram was determined with the ampvis2 package (frequency cut-off >80% and abundance cut-off > 0.01%).

**Supplementary Table 2:** Carbon, water activity and temperature in the substrates and residues.

| Substrate                    | Day | Carbon<br>% DM          | Water activity<br>-     | Temperature<br>°C |
|------------------------------|-----|-------------------------|-------------------------|-------------------|
| <b><i>With BSFL</i></b>      |     |                         |                         |                   |
| <b>Canteen waste</b>         | 0   | 55.9 <sup>†</sup>       | 0.98 <sup>†</sup>       | n.a.              |
|                              | 3   | 53.4 (0.2)              | 0.97 (0.0)              | 28.1 (0.3)        |
|                              | 6   | 54.4 (0.6)              | 0.97 (0.0)              | 29.2 (0.4)        |
|                              | 9   | 55.5 (0.3)              | 0.98 (0.0)              | 29.8 (0.4)        |
|                              | 12  | 55.5 (0.3)              | 0.96 (0.0)              | 29.8 (0.4)        |
| <b>Sterile canteen waste</b> | 0   | 55.9 <sup>†</sup>       | 0.98 <sup>†</sup>       | n.a.              |
|                              | 3   | 53.7 (0.9)              | 0.98 (0.0)              | 28.4 (0.1)        |
|                              | 6   | 54.0 (0.2)              | 0.96 (0.0)              | 28.9 (0.4)        |
|                              | 9   | 54.1 <sup>†</sup>       | 0.96 <sup>†</sup>       | 29.1 (0.1)        |
|                              | 12  | 54.5 <sup>‡</sup> (0.3) | 0.96 <sup>†</sup>       | 29.1 (0.1)        |
| <b>Household waste</b>       | 0   | 51.7 <sup>†</sup>       | 0.99 <sup>†</sup>       | n.a.              |
|                              | 3   | 52.4 <sup>‡</sup> (0.3) | 0.98 <sup>‡</sup> (0.0) | 28.2 (0.2)        |
|                              | 6   | 52.8 (0.6)              | 0.96 (0.0)              | 29.4 (0.5)        |
|                              | 9   | 50.6 (0.8)              | 0.97 (0.0)              | 29.5 (0.2)        |
|                              | 12  | 49.2 (0.5)              | 0.97 (0.0)              | 29.9 (0.1)        |
| <b><i>Without BSFL</i></b>   |     |                         |                         |                   |
| <b>Canteen waste</b>         | 12  | 56.0 <sup>‡</sup> (0.3) | 0.97 (0.0)              | 28.8 (0.0)        |
| <b>Sterile canteen waste</b> | 12  | 53.1 (0.4)              | 0.96 (0.0)              | n.a.              |

In parenthesis: standard deviation for samples where  $n \geq 3$ , differences between analyses where  $n = 2$   
<sup>†</sup>  $n=1$ , <sup>‡</sup>  $n=2$ , n.a. = not analysed
